# Supplementary material
Source: PubMed Central journal article supplement (PMC7544936)
Supplement: TBSD_A_1820381_SM5224.pdf [file TBSD_A_1820381_SM5224.pdf]

## Supplemental Information

### Binding of Raloxifene to Human Complement fragment 5a (<sup>h</sup>C5a): A Perspective on Cytokine Storm and COVID19.

Richa Mishra<sup>1</sup>, Lalita Mohan Behera Das<sup>1</sup> and Soumendhra Rana\*<sup>1</sup>

<sup>1</sup>Chemical Biology Laboratory, School of Basic Sciences, Indian Institute of Technology Bhubaneswar, Odisha 752050, India. Email: [soumendhra@iitbbs.ac.in](mailto:soumendhra@iitbbs.ac.in)

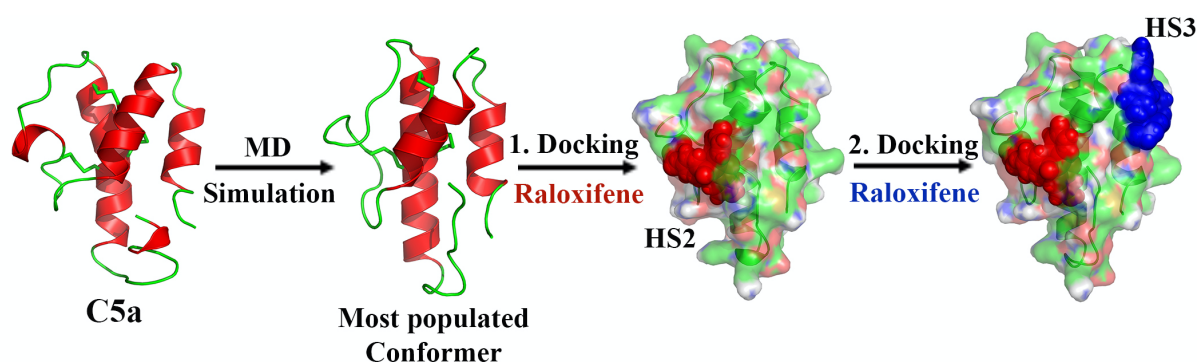

**Figure S1.** Schematic illustration of sequential docking of raloxifene to the <sup>h</sup>C5a or its representative conformers populated during MD simulation.

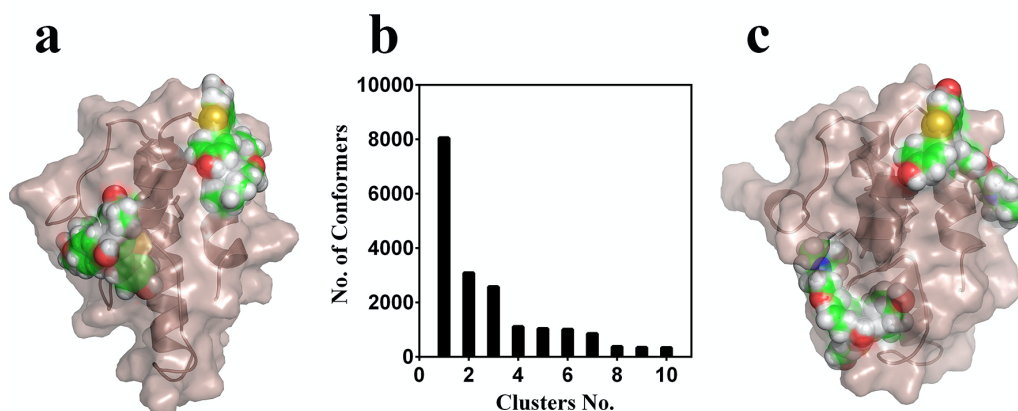

**Figure S2.** (a) The <sup>h</sup>C5a, respectively bound to two molecules of raloxifene at “HS2” and “HS3” subjected to 1  $\mu$ s MD at 300K. (b) Cluster analysis of the raloxifene bound <sup>h</sup>C5a MD trajectory, displaying the number of conformers in the first ten major clusters. (c) The representative central conformer extracted from the first major cluster populated over 1  $\mu$ s MD, indicating the physical viability and stability of the overall complex.
